# Supplementary material for: Benzoxazine Monomers and Polymers Based on 3,3′-Dichloro-4,4′-Diaminodiphenylmethane: Synthesis and Characterization
Source: MDPI journal article supplement (doi:10.3390/polym13091421), 2021-04-28
Supplement: s1 [file s1]

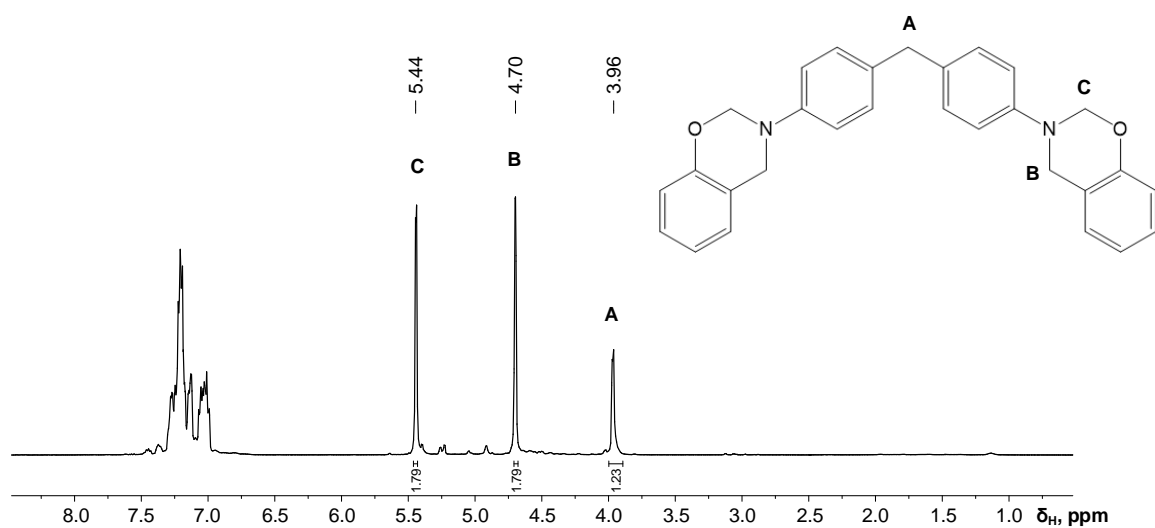

**Figure S1.** <sup>1</sup>H NMR spectrum of benzoxazine based on 4,4'-diaminodiphenylmethane in toluene/isopropanol 2:1.

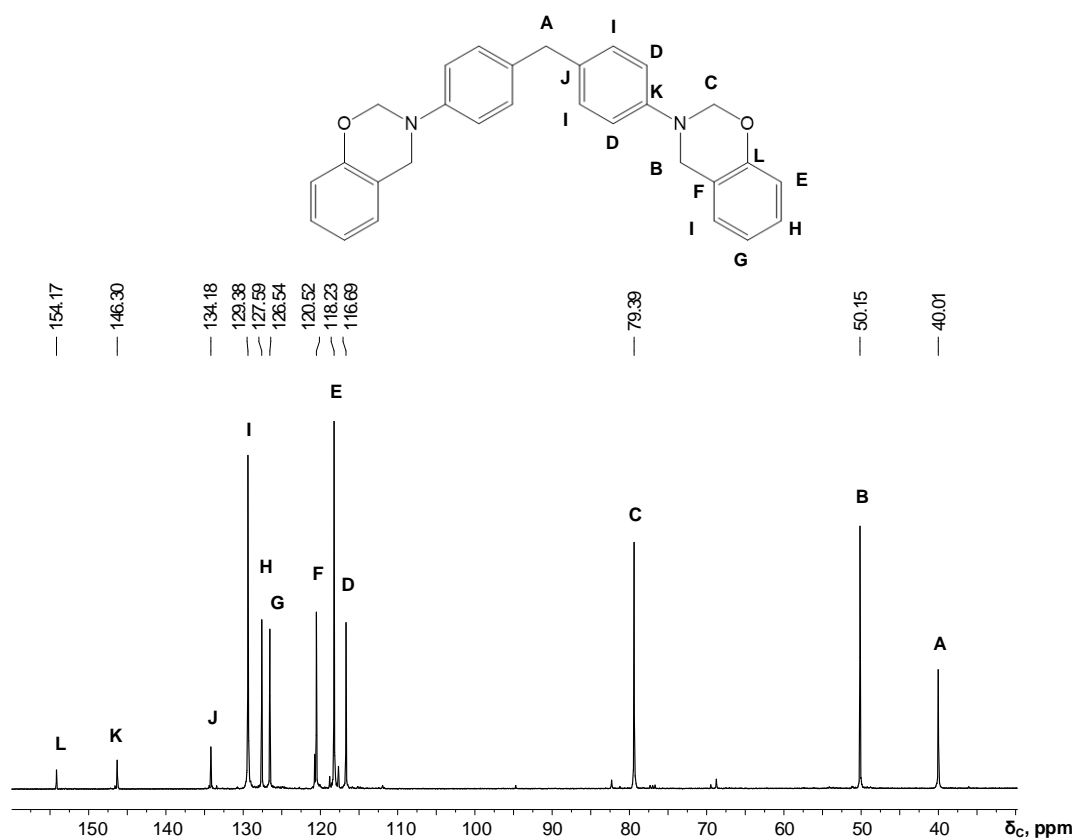

**Figure S2.** <sup>13</sup>C NMR spectrum of benzoxazine based on 4,4'-diaminodiphenylmethane in toluene/isopropanol 2:1.

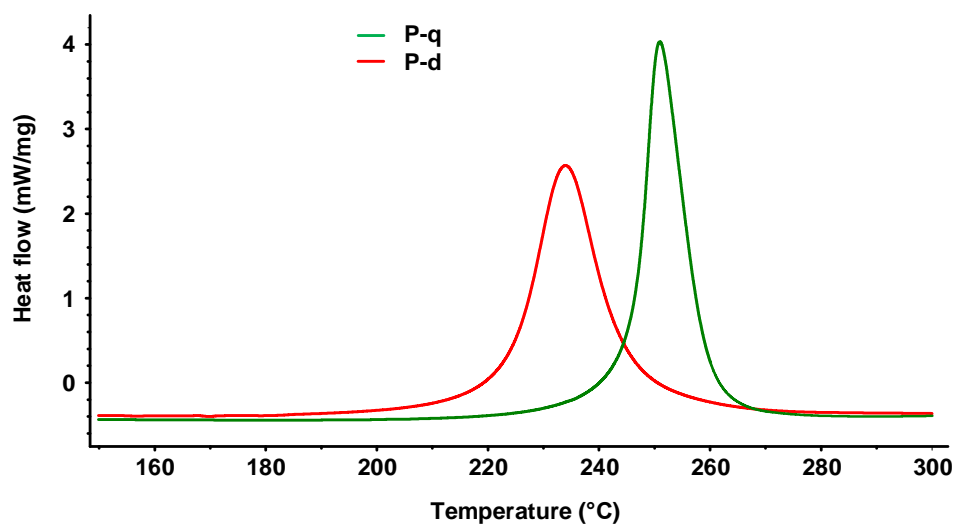

**Figure S3.** The DSC curves describing the curing process of diamines-based benzoxazines (heating rate 10 deg / min).

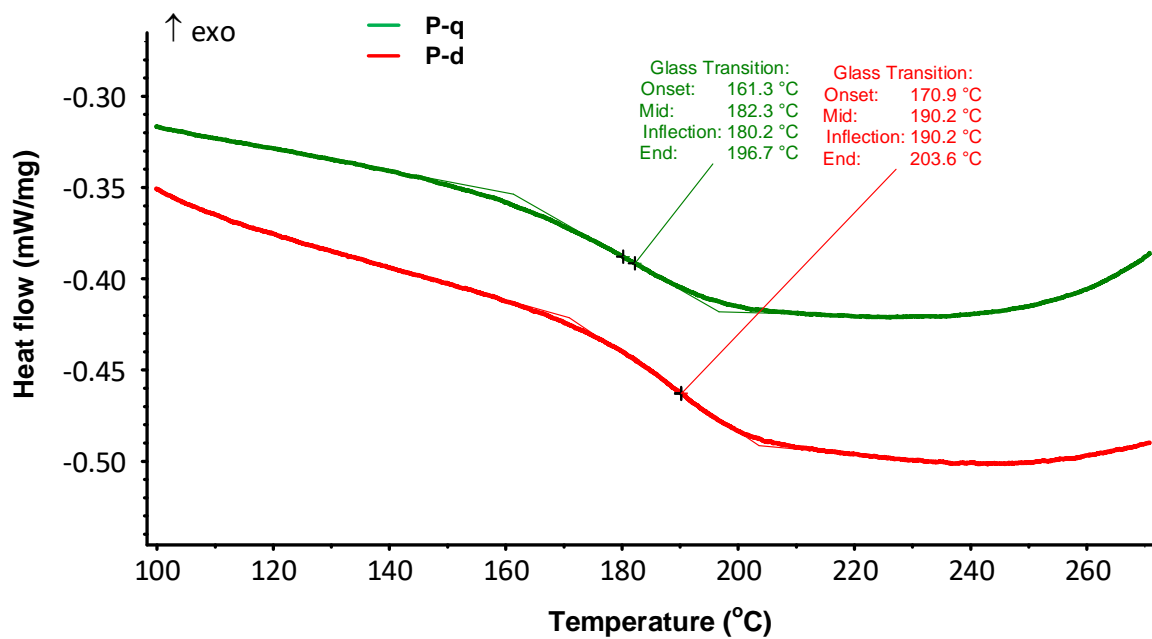

**Figure S4.** DSC curves of polybenzoxazines based on diamines (heating rate 10 deg / min).

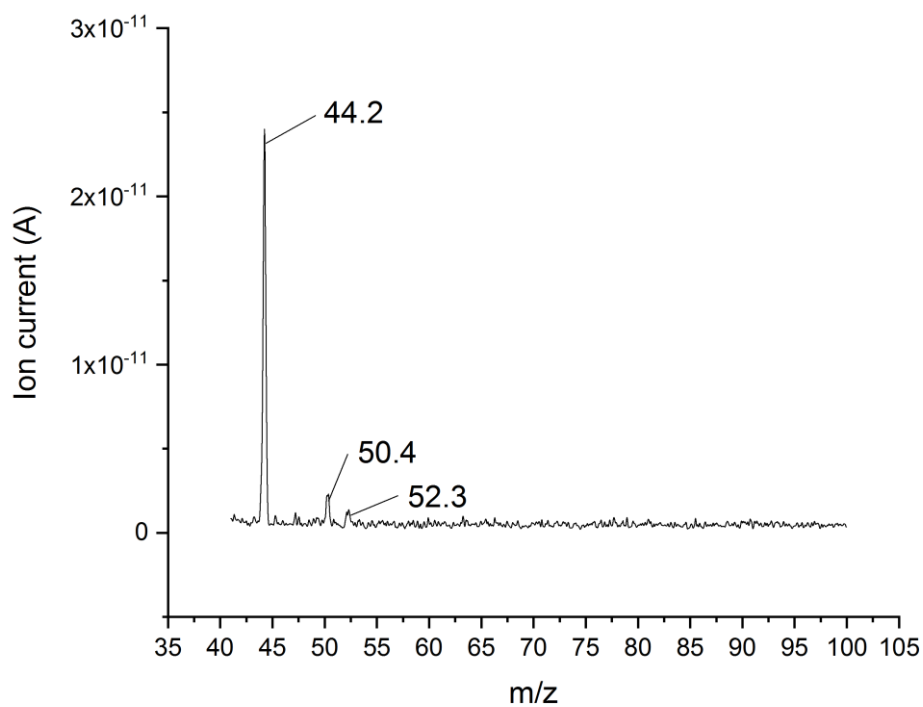

Figure S5. Mass spectrum of degradation of polybenzoxazine P-q in air at 343 °C.

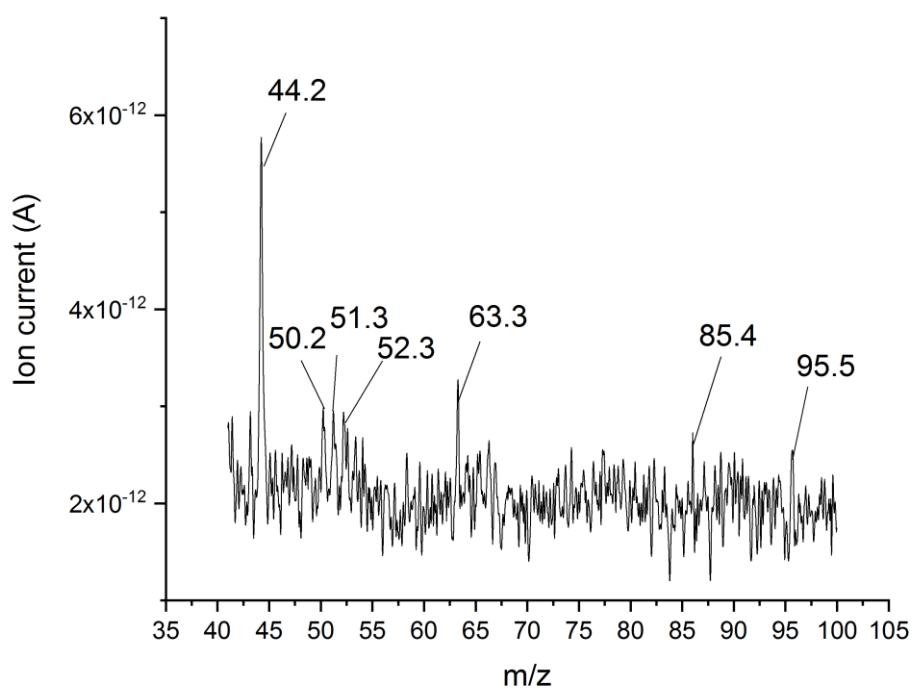

Figure S6. Mass spectrum of degradation of polybenzoxazine P-q in argon at 373 °C.

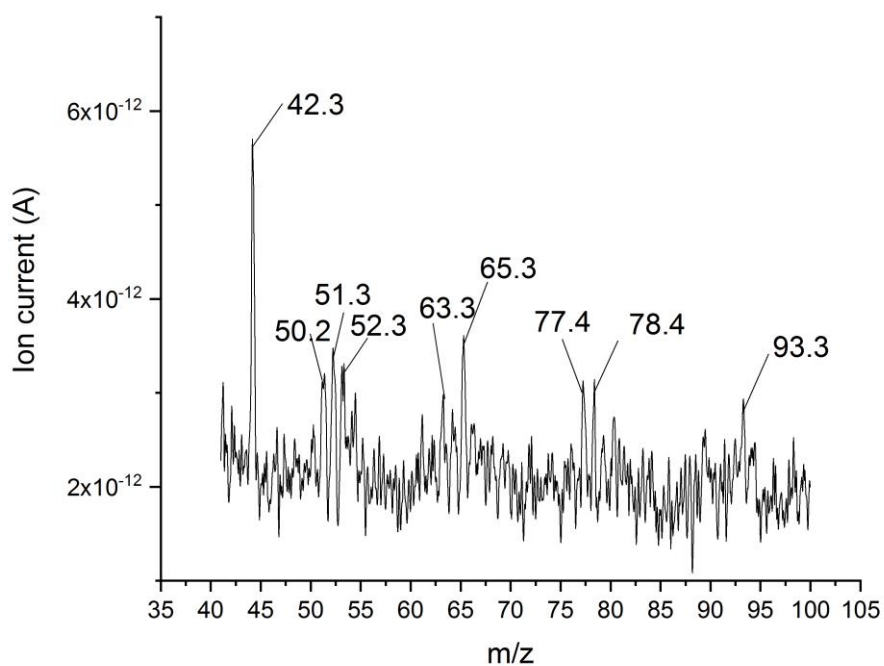

**Figure S7.** Mass spectrum of degradation of polybenzoxazine P-q in argon at 438 °C.

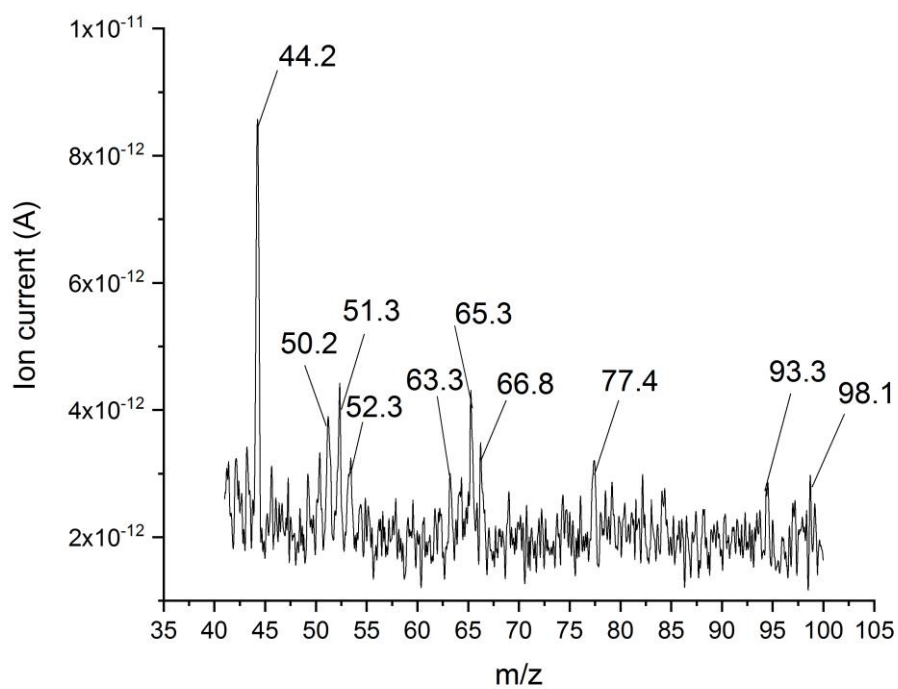

**Figure S8.** Mass spectrum of degradation of polybenzoxazine P-q in argon at 445 °C.
